# Supplementary material
Source: publisher site journal article supplement (https://www.spandidos-publications.com/8618/downloadSupplementary)
Supplement: Supplementary file 1 [file downloadSupplementary]

Table SI. Antibody list for flow cytometry.

| Antibody | Fluorochrome | Catalog number | Dilution | Supplier      |
|----------|--------------|----------------|----------|---------------|
| CD3      | V450         | 560365         | 1:10     | BD Bioscience |
| CD4      | APC-Cy7      | 557871         | 1:10     | BD Bioscience |
| CD5      | PerCP-Cy5.5  | 341089         | 1:2.5    | BD Bioscience |
| CD10     | PE-Cy7       | 341092         | 1:10     | BD Bioscience |
| CD19     | APC          | 555415         | 1:2.5    | BD Bioscience |
| CD19     | APC-R700     | 564977         | 1:10     | BD Bioscience |
| CD20     | APC          | 340941         | 1:10     | BD Bioscience |
| CD22     | BV605        | 740396         | 1:20     | BD Bioscience |
| CD23     | APC          | 558690         | 1:2.5    | BD Bioscience |
| CD25     | PE           | 567214         | 1:20     | BD Bioscience |
| CD25     | PerCP-Cy5.5  | 560503         | 1:10     | BD Bioscience |
| CD27     | APC-R700     | 565116         | 1:10     | BD Bioscience |
| CD38     | BV605        | 740401         | 1:20     | BD Bioscience |
| CD45     | V500-C       | 647449         | 1:10     | BD Bioscience |
| CD56     | FITC         | 340410         | 1:2.5    | BD Bioscience |
| CD79b    | PE           | 557931         | 1:2.5    | BD Bioscience |
| CD103    | BV421        | 563882         | 1:10     | BD Bioscience |
| CD138    | V450         | 562098         | 1:10     | BD Bioscience |
| CD200    | PerCP-Cy5.5  | 562124         | 1:10     | BD Bioscience |
| cλ       | PE           | 652812         | 1:2.5    | BD Bioscience |
| cκ       | FITC         | 652813         | 1:2.5    | BD Bioscience |

|        |         |        |       |               |
|--------|---------|--------|-------|---------------|
| FMC-7  | FITC    | 340919 | 1:2.5 | BD Bioscience |
| HLA-DR | APC-Cy7 | 335796 | 1:10  | BD Bioscience |

For immunophenotypic characterization of lymphoma cells, flow cytometric analysis was performed using a panel of fluorochrome-conjugated antibodies. All antibodies were validated for specificity and titrated to optimal concentrations before use. Fluorochromes were selected to minimize spectral overlap, with clone and catalog numbers provided per manufacturer instructions. Antibodies were stored at 2-8°C in the dark and used before expiration.  $\kappa$ , cytoplasmic  $\kappa$  light chain;  $\lambda$ , cytoplasmic  $\lambda$  light chain; HLA-DR, human leukocyte antigen-DR isotype.
